# Supplementary material for: Enhanced photoelectrochemical water splitting via SILAR-deposited Ti-doped hematite thin films with an FeOOH overlayer
Source: Royal Society of Chemistry journal article supplement (doi:10.1039/c6ta01862a), 2016-01-01
Supplement: c6ta01862a1.pdf [file c6ta01862a1.pdf]

## Electronic Supplementary Information: Enhanced Photoelectrochemical Water Splitting via SILAR-Deposited Ti-Doped Hematite Thin Films with an FeOOH Overlayer

Anthony J. Abel,<sup>†</sup> Anjali M. Patel,<sup>†</sup> Sergey Y. Smolin, Borirak Opasanont<sup>‡</sup> and Jason B. Baxter\*

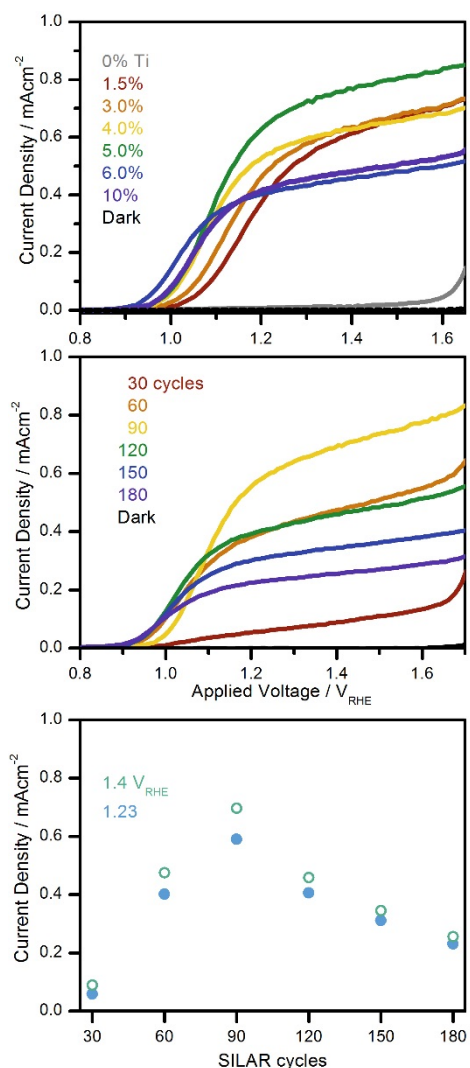

**Figure S1:** (a) JV curves for 45 nm thick Ti:Fe<sub>2</sub>O<sub>3</sub> samples at various Ti/(Ti+Fe) solution ratios. (b) Average current density versus voltage (JV) curves for 5 s% Ti/(Ti+Fe) at various film thicknesses. SILAR cycle number corresponds to approximately twice the film thickness in nm. (c) Current density at two bias voltages as a function of thickness for the sample types in (b).

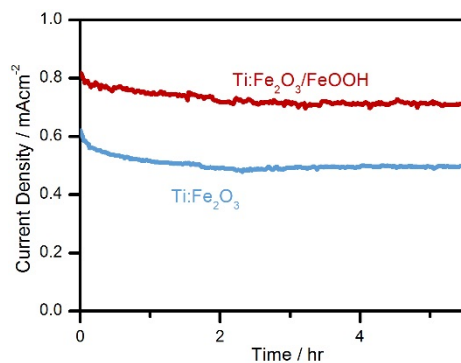

**Figure S2:** Stability of 5% Ti:Fe<sub>2</sub>O<sub>3</sub> with and without an FeOOH overlayer under 1-sun illumination at 1.23 V<sub>RHE</sub>.

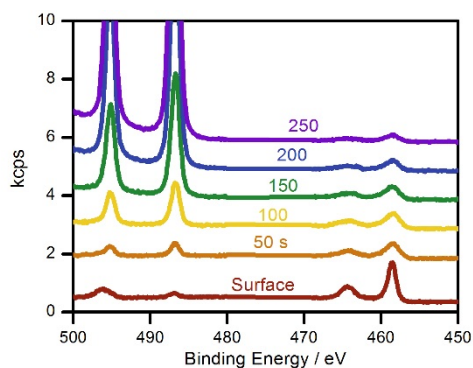

**Figure S3:** Detail spectra for Sn 3d and Ti 2p peaks. Peaks correspond to Sn<sup>4+</sup> and Ti<sup>4+</sup> oxidation state.

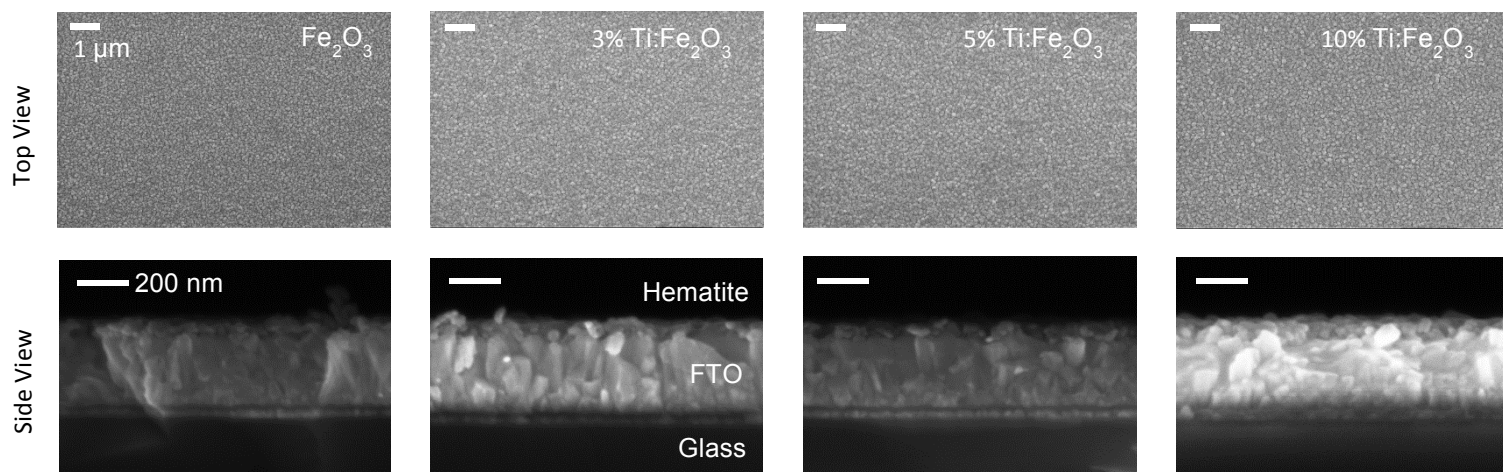

**Figure S4:** Top and side-view scanning electron microscope images of SILAR-deposited Fe<sub>2</sub>O<sub>3</sub> and varying Ti% Ti:Fe<sub>2</sub>O<sub>3</sub> after 90 cycles. Images reveal conformal coating (planar on FTO) and growth rate of ~ 5 Å/cycle.

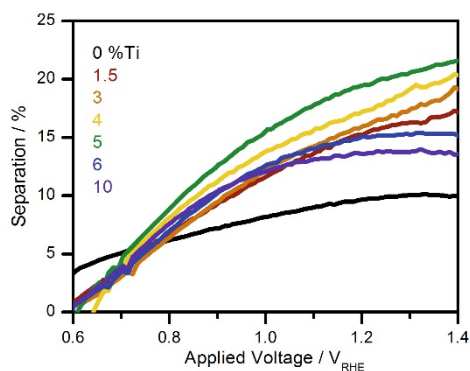

**Figure S5:** Charge separation (sep %) vs. applied voltage curves for carrying Ti% Ti:Fe<sub>2</sub>O<sub>3</sub> generated by  $\eta_{sep} = \frac{J_{ph}^{H_2O_2}}{J_{abs}}$  where  $J_{ph}^{H_2O_2}$  is the photocurrent density under 1-sun illumination in 1 M NaOH | 0.5 M H<sub>2</sub>O<sub>2</sub> (hole scavenging) electrolyte and  $J_{abs}$  is the current density assuming perfect charge collection from absorbed photons.

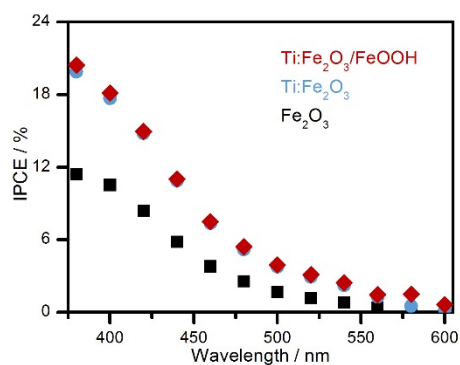

**Figure S6:** Incident photon-to-current conversion efficiency data for Fe<sub>2</sub>O<sub>3</sub>, 5 s% Ti:Fe<sub>2</sub>O<sub>3</sub> with and without an FeOOH overlayer in hole scavenging electrolyte (0.5 M H<sub>2</sub>O<sub>2</sub> and 1 M NaOH in DI water). IPCE divided by absorption is APCE, which is plotted in Fig. 5(a) in the main text.

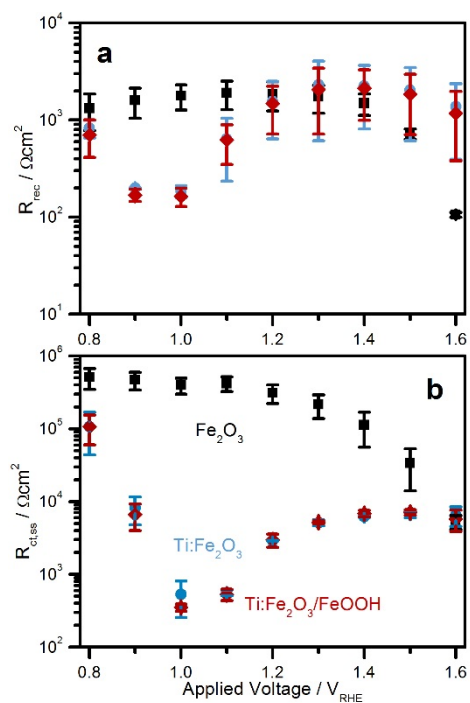

**Figure S7:** (a)  $R_{rec}$  data for  $Fe_2O_3$ , 5 s%  $Ti:Fe_2O_3$  with and without an  $FeOOH$  overlayer. (b)  $R_{ct,ss}$  data for the same sample types; color scheme follows that in (a). The similarity in resistances between the  $Ti:Fe_2O_3$  samples indicates that  $FeOOH$  has no surface catalytic effect. Color scheme for each panel follows that in (b).

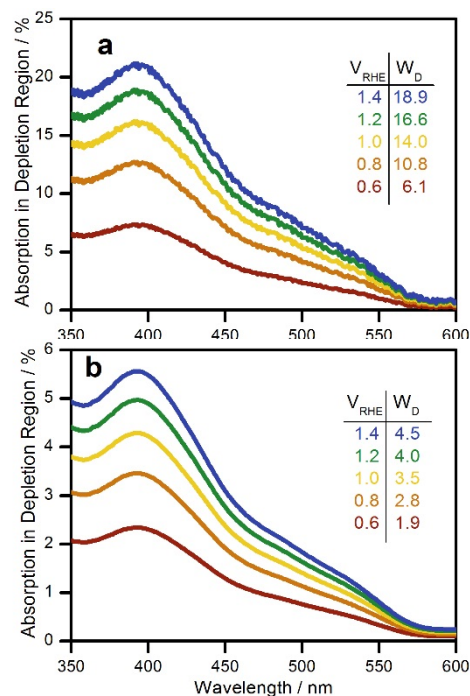

**Figure S8:** Absorption in the depletion region for (a)  $Fe_2O_3$  and (b) 5 s%  $Ti:Fe_2O_3$ . Note the  $\sim 4\times$  difference in scale. Different colors represent different applied voltages that correspond to different depletion widths. Depletion width ( $W_D$ ) is given in nm.

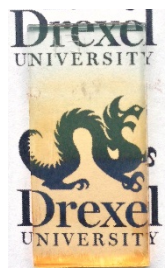

**Figure S9:** (a) Photograph of 90 SILAR cycle 5 s%  $Ti:Fe_2O_3$  sample.
